# Supplementary material for: Pathogenic genetic variants identified in Australian families with paediatric cataract
Source: PubMed Central journal article supplement — BMJ Open Ophthalmol. 2022 Aug 26;7(1):e001064. doi: 10.1136/bmjophth-2022-001064 (PMC9422809; doi:10.1136/bmjophth-2022-001064), 2022-08-26
Supplement: bmjophth-2022-001064supp001.pdf [file bmjophth-2022-001064supp001.pdf]

## Supplementary data

**Table S1 Genome Sequencing QC data**

| Sample        | Total read count | % reads mapped | Average target read coverage | Average sequencing depth ‡ | Average read length |
|---------------|------------------|----------------|------------------------------|----------------------------|---------------------|
| CRCH4-01      | 976.6 M          | 49.3%          | 22                           | 18.3 X                     | 148 bp              |
| CRCH5-01 †    | 933.8 M          | 98.4%          | 43                           | 38.0 X                     | 148 bp              |
| CRCH12-01     | 964.5 M          | 79.1%          | 36                           | 29.6 X                     | 148 bp              |
| CRCH14-04     | 996.1 M          | 79.4%          | 37                           | 32.2 X                     | 148 bp              |
| CRCH21-05     | 518.2 M          | 81.6%          | 33                           | 18.3 X                     | 236 bp              |
| CRCH27-01 †   | 981.5 M          | 81.5%          | 37                           | 32.9 X                     | 148 bp              |
| CRCH28-01     | 965.9 M          | 95.4%          | 43                           | 38.8 X                     | 148 bp              |
| CRCH29-03     | 2072.8 M         | 50.4%          | 49                           | 42.7 X                     | 147 bp              |
| CTAS34-04     | 937.5 M          | 99.1%          | 43                           | 38.4 X                     | 148 bp              |
| CRCH38-01     | 900.9 M          | 88.4%          | 37                           | 31.7 X                     | 146 bp              |
| CRCH41-03 †   | 937.1 M          | 81.7%          | 37                           | 32.3 X                     | 147 bp              |
| CRCH65-01     | 1024.7 M         | 85.2%          | 41                           | 38.0 X                     | 147 bp              |
| CTAS71-01     | 816.4 M          | 98.1%          | 37                           | 33.0 X                     | 147 bp              |
| CTAS72-04     | 992.4 M          | 99.3%          | 46                           | 42.4 X                     | 148 bp              |
| CRVEEH77-02   | 880.7 M          | 98.6%          | 40                           | 35.8 X                     | 147 bp              |
| CRVEEH78-01   | 986.9 M          | 98.3%          | 45                           | 41.2 X                     | 148 bp              |
| CRVEEH79-02 † | 1003.5 M         | 98.7%          | 46                           | 41.3 X                     | 147 bp              |
| CQLD88-04     | 1016.0 M         | 90.5%          | 43                           | 38.2 X                     | 148 bp              |
| CRCH90-02     | 967.5 M          | 51.8%          | 23                           | 19.3 X                     | 147 bp              |
| CSA93-05      | 973.5 M          | 98.4%          | 45                           | 40.7 X                     | 147 bp              |
| CSA100-01 †   | 964.5 M          | 98.6%          | 44                           | 39.5 X                     | 147 bp              |
| CRVEEH113-01  | 961.8 M          | 97.4%          | 44                           | 39.1 X                     | 146 bp              |
| CSA119-05 †   | 1019.0 M         | 98.3%          | 47                           | 40.9 X                     | 147 bp              |
| CSA126-01     | 568.6 M          | 99.9%          | 45                           | 33.7 X                     | 241 bp              |
| CSA128-02 †   | 942.1 M          | 97.7%          | 43                           | 34.3 X                     | 147 bp              |
| CQLD130-01    | 1964.9 M         | 69.7%          | 65                           | 47.5 X                     | 147 bp              |
| CRCH137-02    | 847.2 M          | 84.8%          | 33                           | 29.8 X                     | 148 bp              |
| CSA152-01 †   | 985.2 M          | 99.4%          | 46                           | 40.9 X                     | 148 bp              |
| CSA158-02 †   | 869.5 M          | 99.3%          | 40                           | 37.2 X                     | 148 bp              |
| CSA167        | 1011.2 M         | 98.8%          | 47                           | 42.3 X                     | 148 bp              |
| CSA168-01 †   | 874.0 M          | 98.7%          | 40                           | 35.9 X                     | 147 bp              |
| CSA169-02 †   | 933.9 M          | 99.7%          | 43                           | 37.9 X                     | 148 bp              |
| CSA178-02 †   | 995.0 M          | 99.3%          | 46                           | 42.0 X                     | 148 bp              |
| CSA179        | 569.1 M          | 99.8%          | 45                           | 32.9 X                     | 240 bp              |
| CSA181-01 †   | 930.7 M          | 98.8%          | 43                           | 38.6 X                     | 148 bp              |
| CSA182-02     | 946.6 M          | 98.7%          | 44                           | 37.7 X                     | 147 bp              |
| CSA192        | 906.5 M          | 99.2%          | 42                           | 39.2 X                     | 148 bp              |

MultiQC (v1.9) metrics. M; million. ‡ Average sequencing depth at sites in VCF file. Boxed data points if <30. †family with a proband screened in (Javadiyan et al. 2017).

## Supplementary data

**Table S2 Paediatric cataract genes selected for screening**

| Gene          | Locus    | Inheritance | MIM    | References                                    | Additional ocular phenotypes                          | Other                                                                       |
|---------------|----------|-------------|--------|-----------------------------------------------|-------------------------------------------------------|-----------------------------------------------------------------------------|
| <i>AGK</i>    | 7q34     | AR          | 610345 | (Aldahmesh et al. 2012a) †                    |                                                       | Sengers syndrome (MIM: 212350)                                              |
| <i>BFSP1</i>  | 20p12.1  | AD/AR       | 603307 | (Ramachandran et al. 2007)                    |                                                       |                                                                             |
| <i>BFSP2</i>  | 3q22.1   | AD/AR       | 603212 | (Conley et al. 2000) and (Jakobs et al. 2000) |                                                       |                                                                             |
| <i>CHMP4B</i> | 20q11.22 | AD          | 610897 | (Shiels et al. 2007)                          |                                                       |                                                                             |
| <i>COL4A1</i> | 13q34    | AD          | 120130 | (Xia et al. 2014) †                           |                                                       | Small-vessel brain disease 1 with or without ocular anomalies (MIM: 175780) |
| <i>COL4A2</i> | 13q34    | AD          | 120090 | (Ha et al. 2016)                              |                                                       | Brain small vessel disease 2 (BSVD2, [MIM: 614483])                         |
| <i>CRYAA</i>  | 21q22.3  | AD/AR       | 123580 | (Litt et al. 1998)                            | Microcornea, iris coloboma, nystagmus, microphthalmia |                                                                             |
| <i>CRYAB</i>  | 11q23.1  | AD/AR       | 123590 | (Berry et al. 2001) †                         |                                                       | Myofibrillar myopathy (MFM2, [MIM: 608810])                                 |
| <i>CRYBA1</i> | 17q11.2  | AD/AR       | 123610 | (Kannabiran et al. 1998)                      | Nystagmus                                             |                                                                             |
| <i>CRYBA2</i> | 2q35     | AD          | 600836 | (Reis et al. 2013)                            |                                                       |                                                                             |
| <i>CRYBA4</i> | 22q12.1  | AD/AR       | 123631 | (Billingsley et al. 2006)                     | Microphthalmia, microcornea                           |                                                                             |
| <i>CRYBB1</i> | 22q12.1  | AD/AR       | 600929 | (Willoughby et al. 2005)                      | Microphthalmia, microcornea, nystagmus                |                                                                             |
| <i>CRYBB2</i> | 22q11.23 | AD          | 123620 | (Litt et al. 1997)                            | Microphthalmia, microcornea, strabismus               |                                                                             |
| <i>CRYBB3</i> | 22q11.23 | AD/AR       | 123630 | (Riazuddin et al. 2005)                       | Microcornea                                           |                                                                             |
| <i>CRYGA</i>  | 2q33.3   | AD          | 123660 | (Li et al. 2016)                              |                                                       |                                                                             |
| <i>CRYGB</i>  | 2q33.3   | AD          | 123670 | (AlFadhli et al. 2012)                        |                                                       |                                                                             |

## Supplementary data

|                |          |          |        |                                                  |                                                      |                                                                               |
|----------------|----------|----------|--------|--------------------------------------------------|------------------------------------------------------|-------------------------------------------------------------------------------|
| <i>CRYGC</i>   | 2q33.3   | AD       | 123680 | (Heon et al. 1999)                               | Microcornea, glaucoma, microphthalmia, nystagmus     |                                                                               |
| <i>CRYGD</i>   | 2q33.3   | AD       | 123690 | (Stephan et al. 1999) and (Heon et al. 1999)     | Nystagmus, microcornea                               |                                                                               |
| <i>CRYGS</i>   | 3q27.3   | AD       | 123730 | (Sun et al. 2005)                                | Lens subluxation                                     |                                                                               |
| <i>CTDP1</i>   | 18q23    | AR       | 604927 | (Tzifi et al. 2011)                              |                                                      | Congenital cataract, facial dysmorphism and neuropathy (CCFDN, [MIM: 604168]) |
| <i>CYP27A1</i> | 2q35     | AR       | 606530 | (Khan et al. 2015)                               |                                                      | Cerebrotendinous xanthomatosis (MIM: 21370)                                   |
| <i>CYP51A1</i> | 7q21.2   | AR       | 601637 | (Aldahmesh et al. 2012b)                         |                                                      |                                                                               |
| <i>DNMBP</i>   | 10q24.2  | AR       | 611282 | (Ansar et al. 2018)                              | Nystagmus, amblyopia, exotropia                      |                                                                               |
| <i>EPHA2</i>   | 1p36.13  | AD/AR    | 176946 | (Shiels et al. 2008)                             | Posterior lenticonus                                 |                                                                               |
| <i>EYA1</i>    | 8q13.3   | AD       | 601653 | (Azuma et al. 2000) †                            | Persistence of pupillary membrane, corneal opacity   | Branchio-oto-renal syndrome with or without cataract (BOR1, [MIM:113650])     |
| <i>FBN1</i>    | 15q21.1  | Sporadic | 134797 | (Li et al. 2016) †                               |                                                      | Marfan syndrome (MIM: 154700), Weill-Marchesani syndrome (WMS2 [MIM: 608328]) |
| <i>FOXE3</i>   | 1p33     | AD/AR    | 601094 | (Semina et al. 2001)                             | Anterior segment dysgenesis 2 (ASGD2, [MIM: 610256]) |                                                                               |
| <i>FTL</i>     | 19q13.33 | AD       | 134790 | (Girelli et al. 1995) and (Beaumont et al. 1995) |                                                      | Hyperferritinemia with or without cataract (HHCS, [MIM: 600886])              |
| <i>FYCO1</i>   | 3p21.31  | AR       | 607182 | (Chen et al. 2011)                               |                                                      |                                                                               |

## Supplementary data

|               |                  |       |        |                          |                                                                                                       |                                                                                                                                     |
|---------------|------------------|-------|--------|--------------------------|-------------------------------------------------------------------------------------------------------|-------------------------------------------------------------------------------------------------------------------------------------|
| <i>GALK1</i>  | 17q25.1          | AR    | 604313 | (Stambolian et al. 1995) |                                                                                                       | Galactokinase deficiency with cataract (MIM: 230200)                                                                                |
| <i>GCNT2</i>  | 6p24.3-<br>p24.2 | AR    | 600429 | (Yu et al. 2001)         | Nystagmus                                                                                             | Adult i blood group with cataract (MIM: 110800)                                                                                     |
| <i>GJA3</i>   | 13q12.11         | AD    | 121015 | (Mackay et al. 1999)     |                                                                                                       |                                                                                                                                     |
| <i>GJA8</i>   | 1q21.2           | AD/AR | 600897 | (Shiels et al. 1998)     | Microphthalmia, nystagmus, secondary glaucoma<br>microcornea, corneal opacity, sclerocornea, coloboma |                                                                                                                                     |
| <i>HSF4</i>   | 16q22.1          | AD/AR | 602438 | (Bu et al. 2002)         | Nystagmus                                                                                             |                                                                                                                                     |
| <i>IARS2</i>  | 1q41             | AR    | 612801 | (Li et al. 2018) †       |                                                                                                       | Cataracts, growth hormone deficiency, sensory neuropathy, sensorineural hearing loss and skeletal dysplasia (CAGSSS, [MIM: 616007]) |
| <i>LEMD2</i>  | 6p21.31          | AR    | 616312 | (Boone et al. 2016)      |                                                                                                       |                                                                                                                                     |
| <i>LIM2</i>   | 19q13.41         | AR    | 154045 | (Pras et al. 2002)       | Nystagmus, amblyopia                                                                                  |                                                                                                                                     |
| <i>LONP1</i>  | 19p13.3          | AR    | 605490 | (Khan et al. 2015)       |                                                                                                       | CODAS syndrome (MIM: 600373)                                                                                                        |
| <i>LSS</i>    | 21q22.3          | AR    | 600909 | (Zhao et al. 2015)       |                                                                                                       |                                                                                                                                     |
| <i>MAF</i>    | 16q23.2          | AD    | 177075 | (Jamieson et al. 2002) † | Microcornea, iris coloboma, amblyopia                                                                 | Ayme-Gripp syndrome (MIM: 601088)                                                                                                   |
| <i>MIP</i>    | 12q13.3          | AD    | 154050 | (Berry et al. 2000)      | Nystagmus, strabismus                                                                                 |                                                                                                                                     |
| <i>MIR184</i> | 15q25.1          | AD    | 613146 | (Iliff et al. 2012)      | EDICT syndrome (MIM: 614303)                                                                          |                                                                                                                                     |
| <i>NHS</i>    | Xp22.2-<br>p22.1 | XL    | 300457 | (Coccia et al. 2009) †   | Microcornea, nystagmus, secondary glaucoma, strabismus                                                | Nance-Horan syndrome (MIM: 302350)                                                                                                  |
| <i>PANK4</i>  | 1p36.32          | AD    | 606162 | (Sun et al. 2019)        | Nystagmus                                                                                             |                                                                                                                                     |

## Supplementary data

|                     |                    |          |        |                                                    |                                                                               |                                                                  |
|---------------------|--------------------|----------|--------|----------------------------------------------------|-------------------------------------------------------------------------------|------------------------------------------------------------------|
| <i>PAX6</i>         | 11p13              | AD       | 607108 | (Glaser et al. 1994)                               | Aniridia (MIM: 106210),<br>nystagmus, corneal<br>abnormalities, glaucoma      |                                                                  |
| <i>PEX11B</i>       | 1q21.1             | AR       | 603867 | (Taylor et al. 2017)                               |                                                                               | Peroxisome biogenesis<br>disorder 14B (PBD14B,<br>[MIM: 614920]) |
| <i>PITX3</i>        | 10q24.32           | AD/AR    | 602669 | (Semina et al. 1998)                               | Anterior segment dysgenesis 1<br>(ASGD1, [MIM: 107250])                       |                                                                  |
| <i>PRX</i>          | 19q13.2            | AD       | 605725 | (Yuan et al. 2016)                                 | Amblyopia                                                                     |                                                                  |
| <i>LOC105378949</i> | 1p36.33            | AD       | -      | (Eiberg et al. 2019)                               |                                                                               |                                                                  |
| <i>RRAGA</i>        | 9p22.1             | AD       | 612194 | (Chen et al. 2016)                                 |                                                                               |                                                                  |
| <i>SLC16A12</i>     | 10q23.31           | AD       | 611910 | (Kloeckener-Gruissem et al.<br>2008)               | Microcornea                                                                   | Glucosuria                                                       |
| <i>SLC40A1</i>      | 2q32.2             | AD       | 604653 | (Yamakawa et al. 2016)                             |                                                                               | Hemochromatosis (MIM:<br>606069)                                 |
| <i>SLC7A8</i>       | 14q11.2            | AR       | 604235 | (Knopfel et al. 2019)                              |                                                                               |                                                                  |
| <i>SIPA1L3</i>      | 19q13.1-<br>q13.2  | AR       | 616655 | (Greenlees et al. 2015) and<br>(Evers et al. 2015) | Corneal clouding,<br>microphthalmia, iridocorneal and<br>lenticular adhesions |                                                                  |
| <i>TDRD7</i>        | 9q22.33            | AR       | 611258 | (Lachke et al. 2011)                               |                                                                               |                                                                  |
| <i>TMEM114</i>      | 16p13.2            | AD       | 611579 | (Jamieson et al. 2007)                             |                                                                               |                                                                  |
| <i>TRPM3</i>        | 9q21.12-<br>q21.13 | AD       | 608961 | (Bennett et al. 2014)                              | Open-angle glaucoma                                                           |                                                                  |
| <i>UNC45B</i>       | 17q12              | AD       | 611220 | (Hansen et al. 2014)                               |                                                                               |                                                                  |
| <i>VIM</i>          | 10p13              | AD       | 193060 | (Muller et al. 2009)                               |                                                                               |                                                                  |
| <i>VSX2</i>         | 14q24.3            | AR       | 142993 | (Percin et al. 2000)                               | Microphthalmia, iris coloboma,<br>anophthalmia                                |                                                                  |
| <i>WDR36</i>        | 5q22.1             | Sporadic | 609669 | (Li et al. 2016)                                   |                                                                               |                                                                  |
| <i>WDR87</i>        | 19q13.13           | AR       | -      | (Khan et al. 2015)                                 |                                                                               |                                                                  |

## Supplementary data

|             |        |    |        |                       |               |                                             |
|-------------|--------|----|--------|-----------------------|---------------|---------------------------------------------|
| <i>WFS1</i> | 4p16.1 | AD | 606201 | (Berry et al. 2013) † | Iris coloboma | Wolfram syndrome 1<br>(WFS1, [MIM: 222300]) |
|-------------|--------|----|--------|-----------------------|---------------|---------------------------------------------|

Inheritance; 'AD' autosomal dominant, 'AR' autosomal recessive, 'XL' X-linked, and 'sporadic' if only sporadic non-syndromic case has been reported in Cat-Map prior to publication (Shiels et al. 2010). MIM; gene reference. '-' data unavailable. Reference; initial gene reference. † reference for report of non-syndromic occurrence when gene is primarily known to cause syndromic congenital cataracts. Additional ocular phenotypes; as reported in Cat-Map (Shiels et al. 2010). Other; report of syndrome or condition associated with this gene.

## Supplementary data

**Table S3 Primers use for reported variant validation and segregation analysis**

| Family ID | Gene/variant                           | Primer pair (5' to 3')                          | Anneal temperature (°C) |
|-----------|----------------------------------------|-------------------------------------------------|-------------------------|
| CRCH4     | <i>MIP</i> p.(Arg113Gln)               | CCACCTGTCAATCCTCACCA<br>TGTTCTGCAGGTGGCTATGG    | 57                      |
| CRCH5     | <i>LONP1</i> p.(Pro553Ser)             | AATGGGAATGGCTTTGGGGT<br>TACAAGATTGTCAGCGGCGA    | 59                      |
| CRCH21    | <i>GJA3</i> p.(Pro59Leu)               | CTCTTCCATGCGCACGATGT<br>GGAATCTGAAGCAATGGGCG    | 60                      |
| CRCH28    | <i>EYA1</i> p.(Ser487Leu)              | AATGCTGGGATGAGCTGAGTAG<br>TAAATCCTCAGGTCTGCTTGG | 57                      |
|           | <i>PITX3</i><br>p.(Ter303LeuextTer100) | TGAAAACGAGGGAGGGGAAG<br>ACCCGTGTAACCTCGAGCCT    | 61                      |
| CRCH29    | <i>CRYAA</i> p.(Arg12Cys)              | CTCCATTCTGCTGGTGGCA<br>CAAGACCAGAGTCCATCGCT     | 59                      |
| CTAS34    | <i>MIP</i> p.(Val164Ile)               | CTACCTTGGGGTCAAGAAGGA<br>CTTGAGGAGGTAACACTGTGGC | 57                      |
|           | <i>CRYBB1</i> p.(Ile94Asn)             | ATTTCTCCAGAGCCCAGAACCA<br>GGATGGGAGGACAGGATCATT | 57                      |
| CRCH38    | <i>COL4A1</i> p.(Gly720Asp)            | ATGTCCTGGGACGTTTACAAA<br>AAGTGGGGAACGGCATTGTA   | 57                      |
|           | <i>MIR184</i> n.52T>C                  | CCGGGAAATCAAACGTCCAT<br>AACGCCAGTTTTCCCCATC     | 57                      |
| CTAS71    | <i>GJA8</i> p.(Lys131del)              | CATGGAGGAGAAGCGCAAAG<br>GAAGTAGTGGCCCACGATGA    | 57                      |
| CRVEEH77  | <i>GJA8</i> p.(Pro189Ser)              | ACCCTGCTGAGGACCTACAT<br>GACACAGAGGCCACAGACAA    | 57                      |
| CRVEEH79  | <i>LEMD2</i> p.(?)                     | TTGTTGCGGTAGACATCCCG<br>AAAGGCCAAGTGCAGACCTT    | 57                      |
| CQLD88    | <i>FBN1</i> p.(Pro1141Leu)             | GCTTCCAACCTTTGGCAATGA<br>GAGGCCCCACCTTTAACAT    | 57                      |
| CRCH90    | <i>GJA3</i> p.(Thr19Met)               | TGTCGTAGCAGACGTTCTCG<br>CCCGGTGTTTCATGAGCATT    | 57                      |
| CSA93     | <i>PRX</i> p.(Arg129His)               | AGGGGCAGAGGGTGAATTA<br>ATGCGCCGAGCCTTACAAAG     | 57                      |
| CSA100    | <i>LSS</i> p.(Leu78Val)                | AGTGGGCCACCATAATCACC<br>TTGGGCTGTATGTGAAGAGGG   | 57                      |
| CQLD130   | <i>BFSP2</i> p.(Arg89Trp)              | CTCCAGGACCAATGCCATGAG<br>TGTTTCCAGCTCCTGACTGAC  | 57                      |
| CRCH137   | <i>GJA8</i> p.(Gly22Ser)               | TCGGGGCCTTCTTTGTTCTC<br>GCGAATGTGGGAGATGGGAA    | 57                      |
| CSA158    | <i>WFS1</i> p.(Ala370Val)              | CCCACGCACCACATCAAC<br>CATAGGGCTCCAGGTGGTTC      | 63                      |
|           | <i>CYP51A1</i> p.(Ala94Thr)            | ACCCCAGGACATGGGAAAAG<br>GGTCATGAAAACGAAACTGGG   | 60                      |
| CSA168    | <i>HSF4</i> p.(Lys64Glu)               | TGGTAGAGCGGGACCAGTTT<br>CACCTTCCGAAAACCGTCTG    | 63                      |
| CSA178    | <i>IARS2</i> p.(Gly389Ala)             | CCCCACAGGTGTAGATTTGGA<br>CAGTACCATGGGCAGGTTGT   | 57                      |
| CSA182    | <i>BFSP1</i><br>p.(Glu375GlyfsTer2)    | ATCCTCTGGAGCCCCTTCTT<br>GCCTATTTTCCAACCAGCGT    | 57                      |
| CSA192    | <i>GJA3</i> p.(Gln15Lys)               | TGTCGTAGCAGACGTTCTCG<br>CCCGGTGTTTCATGAGCATT    | 57                      |

+Q; Optimized with Qiagen Q solution

## Supplementary data

**Table S4 Evidence for pathogenicity according to ACMG-AMP guidelines.**

| Family ID                           | Gene  | Variant                                                                   | Supporting evidence for pathogenicity                                                                                                                                                                                                                                                                                                                                                                           | Supporting evidence for benign | ACMG-AMP | ClinVar      |
|-------------------------------------|-------|---------------------------------------------------------------------------|-----------------------------------------------------------------------------------------------------------------------------------------------------------------------------------------------------------------------------------------------------------------------------------------------------------------------------------------------------------------------------------------------------------------|--------------------------------|----------|--------------|
| <b>Pathogenic/Likely pathogenic</b> |       |                                                                           |                                                                                                                                                                                                                                                                                                                                                                                                                 |                                |          |              |
| CRCH21                              | GJA3  | (NC_000013.10)Chr13:g.20717252G>A<br>NM_021954.4:c.176C>T<br>p.(Pro59Leu) | PM2, PP1_strong, PP3<br>Absent/near absent from population databases. Same variant previously established as pathogenic variant (report with cataract PMID: 15208569, 19182255, 21866213, 25148791, 26694549, 27609163), segregation (strong) with the disease in three families with 19 meioses (this study and PMID: 15208569, 27609163). Multiple predictive tools assessing variant as damaging/pathogenic. | -                              | LP       | SCV001573165 |
| CRCH90                              | GJA3  | (NC_000013.10)Chr13:g.20717372G>A<br>NM_021954.4:c.56C>T<br>p.(Thr19Met)  | PM2, PP1_strong, PP3<br>Absent/near absent from population databases. Same variant has been reported as pathogenic (report with cataract PMID: 28839118, 21031021, 29461512), segregation (strong) with the disease in four families with five meioses (this study and PMID: 28839118, 21031021, 29461512). Multiple predictive tools assessing variant as damaging/pathogenic.                                 | -                              | LP       | SCV001573166 |
| CRCH29                              | CRYAA | (NC_000021.8)Chr21:g.44589243C>T<br>NM_000394.4:c.34C>T<br>p.(Arg12Cys)   | PM2, PP1_strong, PP3<br>Absent/near absent from population databases.<br>Same variant previously established pathogenic (report with cataract PMID: 23508780, 19503744, 17724170, 18587492, 19390652, 21686328, 30078984, 32010934), segregation (strong) with the disease in nine families with 20 meioses (this study and PMID:                                                                               | -                              | LP       | SCV001573167 |



## Supplementary data

|        |               |                                                                                      |                                                                                                                                                                                                                                                                                                                                                                                    |                                                                                     |     |                  |
|--------|---------------|--------------------------------------------------------------------------------------|------------------------------------------------------------------------------------------------------------------------------------------------------------------------------------------------------------------------------------------------------------------------------------------------------------------------------------------------------------------------------------|-------------------------------------------------------------------------------------|-----|------------------|
|        |               |                                                                                      | 23508780, 19503744, 17724170, 18587492, 19390652, 21686328, 30078984, 32010934). Multiple predictive tools assessing variant as damaging/pathogenic.                                                                                                                                                                                                                               |                                                                                     |     |                  |
| CRCH38 | <i>COL4A1</i> | (NC_000013.10)Chr13:g.110833673C>T<br>NM_001845.6:c.2159G>A<br>p.(Gly720Asp)         | PM2, PP1_strong, PP3<br>Absent/near absent from population databases. Alternate source reports variant as pathogenic in family with additional congenital cataract phenotype (PMID: 17696175), segregation (strong) with the disease in two families with 6 meioses (this study and PMID: 17696175). Multiple predictive tools assessing variant as damaging/pathogenic.           | -                                                                                   | LP  | SCV0015<br>73168 |
|        | <i>MIR184</i> | (NC_000015.9)Chr15:g.79502181T>C<br>NR_029705.1:n.52T>C                              | PM2, PP3<br>Absent/near absent from population databases. Multiple predictive tools assessing variant as damaging/pathogenic.                                                                                                                                                                                                                                                      | BP4<br>RNA folding<br>predictive evidence of non-damaging/benign effect on product. | VUS | SCV0015<br>73169 |
| CSA168 | <i>HSF4</i>   | (NC_000016.9)Chr16:g.67199491A>G<br>NM_001040667.3:c.190A>G<br>p.(Lys64Glu)          | PM1, PM2, PP1_strong, PP3<br>Variant located in functional protein region, a highly conserved DNA binding domain with multiple pathogenic variants. Absent/near absent from population databases. Segregation (strong) with the disease in one family previously reported with eight meioses (PMID: 29243736). Multiple predictive tools assessing variant as damaging/pathogenic. | -                                                                                   | LP  | SCV0015<br>73170 |
| CRCH28 | <i>PITX3</i>  | (NC_000010.10)Chr10:g.103990272C>A<br>NM_005029.4:c.908G>T<br>p.(Ter303LeuextTer100) | PM2, PM4, PP1_supporting, PP3<br>Absent/near absent from population databases. Protein length altered due to loss of native stop codon. Supporting segregation evidence in the family with ≥3 meioses. Multiple predictive tools assessing variant as damaging/pathogenic.                                                                                                         | -                                                                                   | LP  | SCV0015<br>73171 |

## Supplementary data

|                                                                               |              |                                                                                          |                                                                                                                                                                                                                                                                                                                                    |                                                                                                                                                                                                                |     |                  |
|-------------------------------------------------------------------------------|--------------|------------------------------------------------------------------------------------------|------------------------------------------------------------------------------------------------------------------------------------------------------------------------------------------------------------------------------------------------------------------------------------------------------------------------------------|----------------------------------------------------------------------------------------------------------------------------------------------------------------------------------------------------------------|-----|------------------|
|                                                                               | <i>EYA1</i>  | (NC_000008.10)Chr8:g.72127864G>A<br>NM_000503.6:c.1460C>T<br>p.(Ser487Leu)               | -                                                                                                                                                                                                                                                                                                                                  | BS4, BP4, BS1<br>Lack of segregation in affected family members, multiple predictive tools assessing the variant as non-damaging/benign. Present in population databases more than expected for the condition. | B   | SCV0015<br>73172 |
| CSA182                                                                        | <i>BFSP1</i> | (NC_000020.10)Chr20:g.17475593del<br>NM_001195.5:c.1124del<br>p.(Glu375GlyfsTer2)        | PM2, PM4, PP1_strong, PP3<br>Absent/near absent from population databases. Protein length changes due to introduction of premature stop codon. PP1_strong segregation evidence with ≥5 meioses in family. Multiple predictive tools assessing variant as damaging/pathogenic.                                                      | -                                                                                                                                                                                                              | LP  | SCV0015<br>73173 |
| CRVEEH77                                                                      | <i>GJA8</i>  | (NC_000001.10)Chr1:g.147380647C>T<br>NM_005267.5:c.565C>T<br>p.(Pro189Ser)               | PM2, PM5, PP1_supporting, PP3<br>Absent/near absent from population databases. Variant at an amino acid where a different missense variant was predicted pathogenic (PMID: 17724170). Segregation (supporting) with the disease in the family with ≥3 meioses. Multiple predictive tools assessing variant as damaging/pathogenic. | -                                                                                                                                                                                                              | LP  | SCV0015<br>73174 |
| <b>Variants of uncertain significance with evidence towards pathogenicity</b> |              |                                                                                          |                                                                                                                                                                                                                                                                                                                                    |                                                                                                                                                                                                                |     |                  |
| CRCH137                                                                       | <i>GJA8</i>  | (NC_000001.10)Chr1:g.147380146G>A<br>NM_005267.5:c.64G>A<br>p.(Gly22Ser)                 | PM2, PP3<br>Absent/near absent from population databases and multiple predictive tools assessing variant as damaging/pathogenic.                                                                                                                                                                                                   | -                                                                                                                                                                                                              | VUS | SCV0015<br>73175 |
| CTAS71                                                                        | <i>GJA8</i>  | (NC_000001.10)Chr1:g.147380470_147380472del<br>NM_005267.5:c.388_390del<br>p.(Lys131del) | PM2, PM4_supporting, PP3<br>Absent/near absent from population databases. In-frame deletion changes protein length, but in cytoplasmic region                                                                                                                                                                                      | -                                                                                                                                                                                                              | VUS | SCV0015<br>73176 |

## Supplementary data

|          |               |                                                                            |                                                                                                                                                                                                                                                                            |     |     |                  |
|----------|---------------|----------------------------------------------------------------------------|----------------------------------------------------------------------------------------------------------------------------------------------------------------------------------------------------------------------------------------------------------------------------|-----|-----|------------------|
|          |               |                                                                            | with variable amino acid conservation between species. Multiple predictive tools assessing variant as damaging/pathogenic.                                                                                                                                                 |     |     |                  |
| CSA192   | <i>GJA3</i>   | (NC_000013.10)Chr13:g.20717385G>T<br>NM_021954.4:c.43C>A<br>p.(Gln15Lys)   | PM2, PP3<br>Absent/near absent from population databases and multiple predictive tools assessing variant as damaging/pathogenic.                                                                                                                                           | -   | VUS | SCV0015<br>73177 |
| CRVEEH79 | <i>LEMD2</i>  | (NC_000006.11)Chr6:g.33756893T>C<br>NM_001348710.2:c.1A>G<br>p.(?)         | PM2, PP3<br>Absent/near absent from population databases. Multiple predictive tools assessing variant as damaging/pathogenic.<br>Note: Variant causes loss of start codon with likely loss of function, but haploinsufficiency has not been shown to cause disease before. | -   | VUS | SCV0015<br>73178 |
| CSA93    | <i>PRX</i>    | (NC_000019.9)Chr19:g.40904522C>T<br>NM_020956.2:c.386G>A<br>p.(Arg129His)  | PM2, PP1_supporting, PP3<br>Absent/near absent from population databases. Segregation (supporting) with the disease in the family with ≥3 meioses. Multiple predictive tools assessing variant as damaging/pathogenic.                                                     | -   | VUS | SCV0015<br>73179 |
| CTAS34   | <i>CRYBB1</i> | (NC_000022.10)Chr22:g.27008054A>T<br>NM_001887.4:c.281T>A<br>p.(Ile94Asn)  | PM2, PP3<br>Absent/near absent from population databases and multiple predictive tools assessing variant as damaging/pathogenic.                                                                                                                                           | -   | VUS | SCV0015<br>73180 |
|          | <i>MIP</i>    | (NC_000012.11)Chr12:g.56847410C>T<br>NM_012064.4:c.490G>A<br>p.(Val164Ile) | PM2<br>Variant observed at a low rate in population data.                                                                                                                                                                                                                  | BP4 | VUS | SCV0015<br>73181 |
| CQLD130  | <i>BFSP2</i>  | (NC_000003.11)chr3:g.133119192C>T<br>NM_003571.4:c.265C>T<br>p.(Arg89Trp)  | PM2, PP1_supporting, PP3<br>Supporting for absent/near absent from population databases. Segregation (supporting) with the disease in the family with ≥3 meioses. Multiple predictive tools assessing variant as damaging/pathogenic.                                      | -   | VUS | SCV0015<br>73182 |

## Supplementary data

|                                                                                   |                |                                                                              |                                                                                                                                        |                                                                                                                                                                   |     |                  |
|-----------------------------------------------------------------------------------|----------------|------------------------------------------------------------------------------|----------------------------------------------------------------------------------------------------------------------------------------|-------------------------------------------------------------------------------------------------------------------------------------------------------------------|-----|------------------|
| CRCH4                                                                             | <i>MIP</i>     | (NC_000012.11)Chr12:g.56848060C>T<br>NM_012064.4:c.338G>A<br>p.(Arg113Gln)   | PM2, PP3<br>Absent/near absent from population<br>databases. Multiple predictive tools<br>assessing variant as damaging/pathogenic.    | BS2<br>Observed in health<br>adult obligate carrier<br>(and 2 other<br>unaffected children)<br>with full penetrance<br>expected at an early<br>age.               | VUS | SCV0015<br>73183 |
| <b>Variants of uncertain significance that are unlikely to be causing disease</b> |                |                                                                              |                                                                                                                                        |                                                                                                                                                                   |     |                  |
| CSA158                                                                            | <i>CYP51A1</i> | (NC_000007.13)Chr7:g.91761099C>T<br>NM_000786.4:c.280G>A<br>p.(Ala94Thr)     | PM2, PP3<br>Absent/near absent from population<br>databases and multiple predictive tools<br>assessing variant as damaging/pathogenic. | -                                                                                                                                                                 | VUS | SCV0015<br>73184 |
|                                                                                   | <i>WFS1</i>    | (NC_000004.11)Chr4:g.6302631C>T<br>NM_001145853.1:c.1109C>T<br>p.(Ala370Val) | PM2, PP3<br>Absent/near absent from population<br>databases and multiple predictive tools<br>assessing variant as damaging/pathogenic. | BS4<br>Lack of segregation in<br>an affected member<br>of the family.                                                                                             | VUS | SCV0015<br>73185 |
| CRCH5                                                                             | <i>LONP1</i>   | (NC_000019.9)Chr19:g.5694473G>A<br>NM_001276480.1:c.1657C>T<br>p.(Pro553Ser) | PM2, PP3<br>Absent/near absent from population<br>databases and multiple predictive tools<br>assessing variant as damaging/pathogenic. | BS4<br>Variant does not<br>segregate with the<br>disease in the family,<br>absent from affected<br>individual.                                                    | VUS | SCV0015<br>73186 |
| CSA178                                                                            | <i>IARS2</i>   | (NC_000001.10)Chr1:g.220279332G>C<br>NM_018060.4:c.1166G>C<br>p.(Gly389Ala)  | PM2, PP3<br>Absent/near absent from population<br>databases and multiple predictive tools<br>assessing variant as damaging/pathogenic. | BS4<br>Lack of segregation in<br>affected member of<br>family.                                                                                                    | VUS | SCV0015<br>73187 |
| CQLD88                                                                            | <i>FBN1</i>    | (NC_000015.9)Chr15:g.48779550G>A<br>NM_000138.5:c.3422C>T<br>p.(Pro1141Leu)  | PP3<br>Multiple predictive tools assessing variant<br>as damaging/pathogenic.                                                          | BS1, BS2<br>Present in the<br>population database<br>more than expected<br>for the disease.<br>Variant is observed in<br>unaffected individuals<br>in the family. | VUS | SCV0015<br>73188 |

## Supplementary data

---

|        |     |                                                                             |                                                         |                                                                                                                                                                      |     |                  |
|--------|-----|-----------------------------------------------------------------------------|---------------------------------------------------------|----------------------------------------------------------------------------------------------------------------------------------------------------------------------|-----|------------------|
| CSA100 | LSS | (NC_000021.8)Chr21:g.47647553G>C<br>NM_001001438.3:c.232C>G<br>p.(Leu78Val) | PM2<br>Absent/near absent from population<br>databases. | BS4, BP4<br>Lack of segregation<br>with affected<br>members of the<br>family. Multiple<br>predictive tools<br>assess the amino<br>acid change as non-<br>pathogenic. | VUS | SCV0015<br>73189 |
|--------|-----|-----------------------------------------------------------------------------|---------------------------------------------------------|----------------------------------------------------------------------------------------------------------------------------------------------------------------------|-----|------------------|

---

Variant interpretation based on the American College of Medical Genetics and Genomics (ACMG-AMP) guidelines (Richards et al. 2015), 'P' Pathogenic, 'LP' Likely Pathogenic, 'VUS' Variant of Uncertain Significance, and 'B' Benign. ClinVar; variant accession number.

---

## Supplementary data

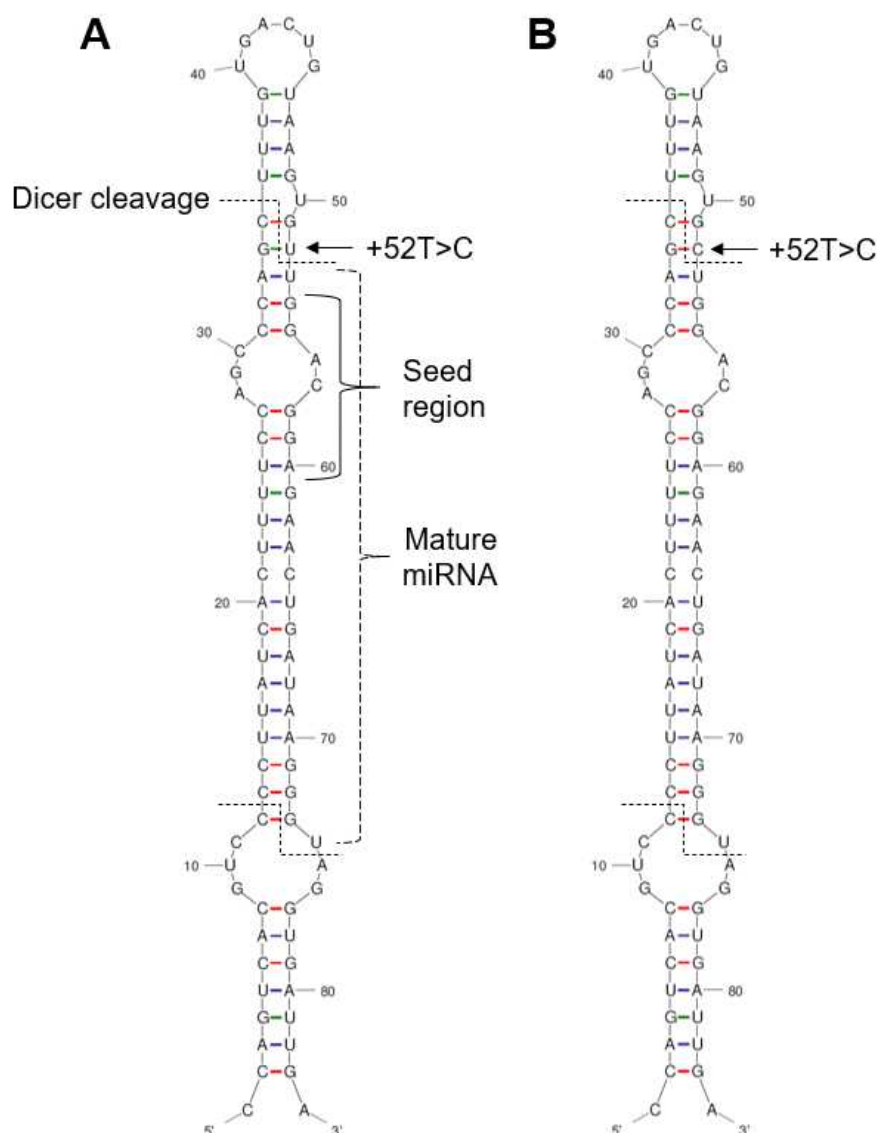

**Figure S1 Predicted impact of the NR\_029705.1:n.+52T>C variant on miR-184 structure and stability.** The *MIR184* variant in family CRCH38 was assessed using mFold (Zuker 2003). No difference in miRNA folding was observed between wild-type miR-184 (A) and +52T>C variant carrier miR-184 (B). Minimum free energy prediction dropped from -35.50kcal/mol to -37.90kcal/mol with the T>C nucleotide change, increasing the stability of the molecule.

## Supplementary data

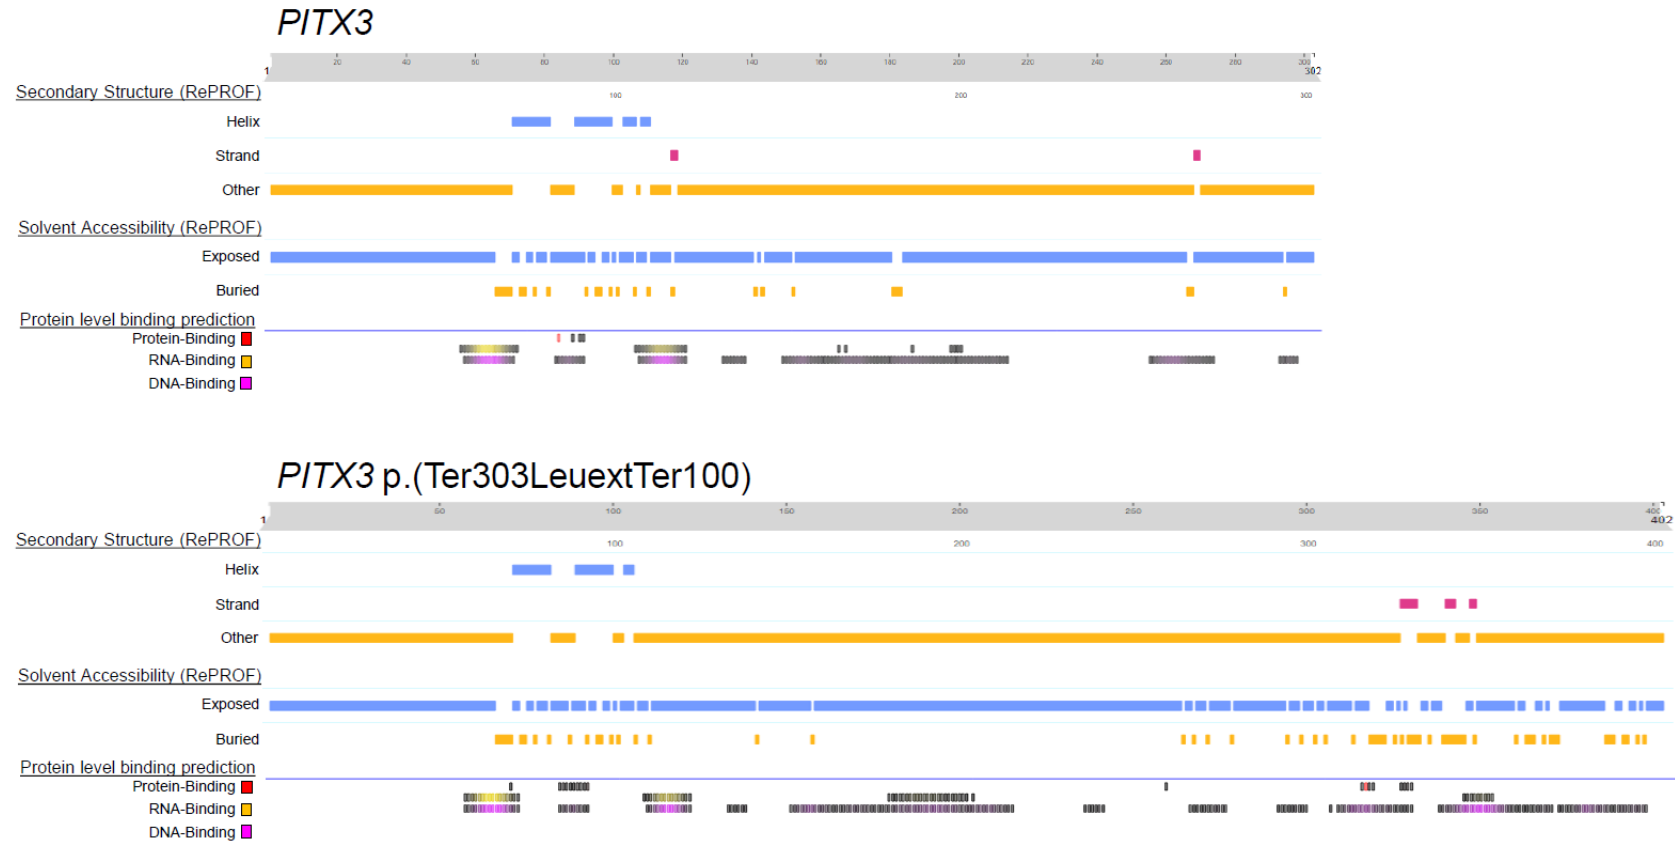

**Figure S2 *PITX3* protein folding prediction.** Comparison of wild-type *PITX3* and CRCH28 family stop loss p.(Ter303LeuextTer100) *PITX3* variant sequence using PredictProtein folding prediction tool (<https://predictprotein.org>). Each panel displays predicted secondary structure and solvent accessibility, with protein level binding predictions appended below. *PITX3*\_variant sequence has been stretched to enable vertical comparison of the complementary initial 1-302 amino acid positions.

## Supplementary data

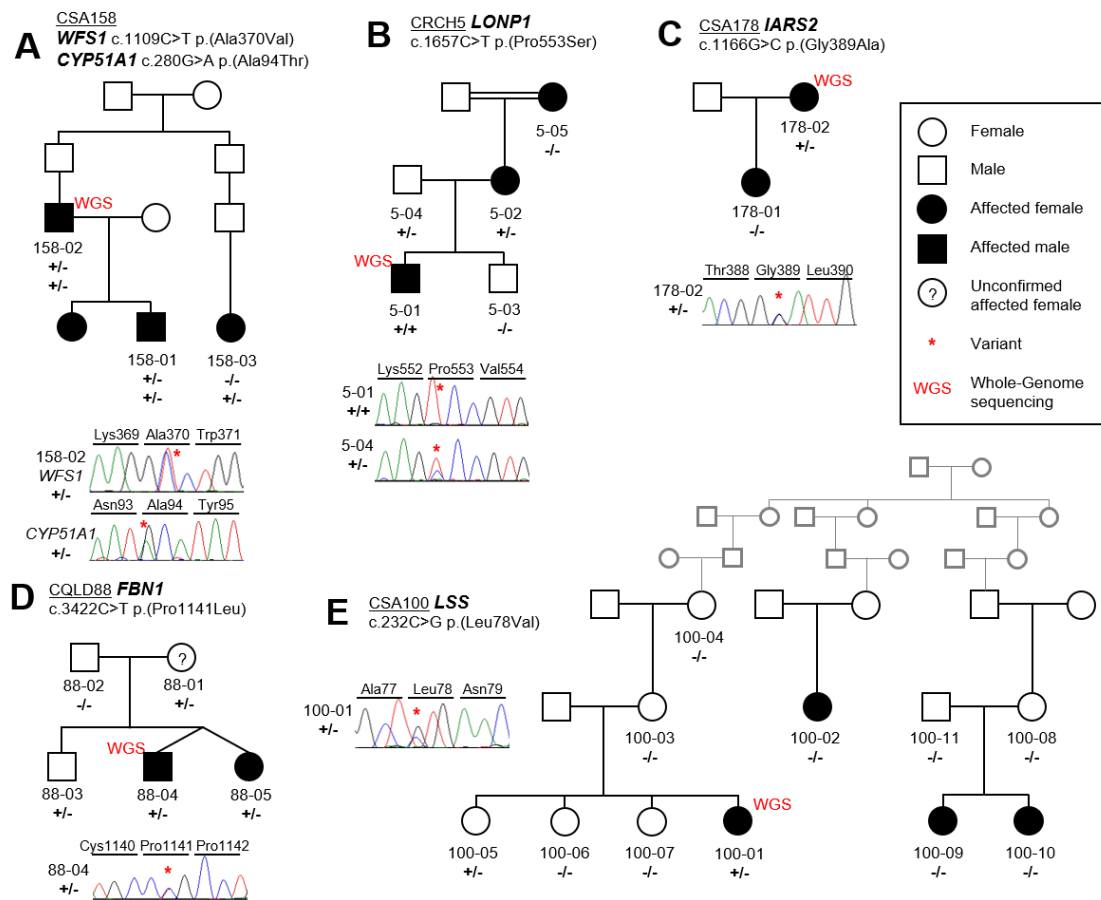

**Figure S3 Variants of uncertain significance that are unlikely to be disease causing.** Family pedigrees and accompanying sequencing chromatograms from variant analysis. A; Family CSA158 with a segregating *CYP51A1* p.(Ala94Thr) and non-segregating *WFS1* p.(Ala370Val) variants. B; *LONP1* variant enters pedigree twice to enable homozygous status in the proband in family CRCH5. C; In family CSA178, an *IARS2* variant was observed affected mother only. D; In family CQLD88, a *FBN1* variant was observed in an unaffected individual. E; Large pedigree CSA100 displays a *LSS* variant in an affected and unaffected sibling pair, that has entered in the pedigree in the previous generation.



Supplementary data

### References:

- Aldahmesh MA, Khan AO, Mohamed JY, Alghamdi MH, Alkuraya FS. 2012a. Identification of a truncation mutation of acylglycerol kinase (agk) gene in a novel autosomal recessive cataract locus. *Human mutation*. 33(6):960-962.
- Aldahmesh MA, Khan AO, Mohamed JY, Hijazi H, Al-Owain M, Alswaid A, Alkuraya FS. 2012b. Genomic analysis of pediatric cataract in Saudi Arabia reveals novel candidate disease genes. *Genetics in medicine : official journal of the American College of Medical Genetics*. 14(12):955-962.
- AlFadhli S, Abdelmoaty S, Al-Hajeri A, Behbehani A, Alkuraya F. 2012. Novel crystallin gamma b mutations in a Kuwaiti family with autosomal dominant congenital cataracts reveal genetic and clinical heterogeneity. *Molecular vision*. 18:2931-2936.
- Ansar M, Chung HL, Taylor RL, Nazir A, Imtiaz S, Sarwar MT, Manousopoulou A, Makrythanasis P, Saeed S, Falconnet E et al. 2018. Bi-allelic loss-of-function variants in dnmbp cause infantile cataracts. *American journal of human genetics*. 103(4):568-578.
- Azuma N, Hirakiyama A, Inoue T, Asaka A, Yamada M. 2000. Mutations of a human homologue of the Drosophila eyes absent gene (eya1) detected in patients with congenital cataracts and ocular anterior segment anomalies. *Human molecular genetics*. 9(3):363-366.
- Beaumont C, Leneuve P, Devaux I, Scoazec JY, Berthier M, Loiseau MN, Grandchamp B, Bonneau D. 1995. Mutation in the iron responsive element of the I ferritin mRNA in a family with dominant hyperferritinaemia and cataract. *Nature genetics*. 11(4):444-446.
- Bennett TM, Mackay DS, Siegfried CJ, Shiels A. 2014. Mutation of the melastatin-related cation channel, trpm3, underlies inherited cataract and glaucoma. *PLoS one*. 9(8):e104000.
- Berry V, Francis P, Kaushal S, Moore A, Bhattacharya S. 2000. Missense mutations in mip underlie autosomal dominant 'polymorphic' and lamellar cataracts linked to 12q. *Nature genetics*. 25(1):15-17.
- Berry V, Francis P, Reddy MA, Collyer D, Vithana E, MacKay I, Dawson G, Carey AH, Moore A, Bhattacharya SS et al. 2001. Alpha-b crystallin gene (cryab)

## Supplementary data

- mutation causes dominant congenital posterior polar cataract in humans. *American journal of human genetics*. 69(5):1141-1145.
- Berry V, Gregory-Evans C Fau - Emmett W, Emmett W Fau - Waseem N, Waseem N Fau - Raby J, Raby J Fau - Prescott D, Prescott D Fau - Moore AT, Moore At Fau - Bhattacharya SS, Bhattacharya SS. 2013. Wolfram gene (wfs1) mutation causes autosomal dominant congenital nuclear cataract in humans. (1476-5438 (Electronic)).
- Billingsley G, Santhiya ST, Paterson AD, Ogata K, Wodak S, Hosseini SM, Manisastry SM, Vijayalakshmi P, Gopinath PM, Graw J et al. 2006. Cryba4, a novel human cataract gene, is also involved in microphthalmia. *American journal of human genetics*. 79(4):702-709.
- Boone PM, Yuan B, Gu S, Ma Z, Gambin T, Gonzaga-Jauregui C, Jain M, Murdock TJ, White JJ, Jhangiani SN et al. 2016. Hutterite-type cataract maps to chromosome 6p21.32-p21.31, cosegregates with a homozygous mutation in *lmd2*, and is associated with sudden cardiac death. *Molecular genetics & genomic medicine*. 4(1):77-94.
- Bu L, Jin Y, Shi Y, Chu R, Ban A, Eiberg H, Andres L, Jiang H, Zheng G, Qian M et al. 2002. Mutant DNA-binding domain of *hsf4* is associated with autosomal dominant lamellar and marner cataract. *Nature genetics*. 31(3):276-278.
- Chen J, Ma Z, Jiao X, Fariss R, Kantorow WL, Kantorow M, Pras E, Frydman M, Pras E, Riazuddin S et al. 2011. Mutations in *fyco1* cause autosomal-recessive congenital cataracts. *American journal of human genetics*. 88(6):827-838.
- Chen JH, Huang C, Zhang B, Yin S, Liang J, Xu C, Huang Y, Cen LP, Ng TK, Zheng C et al. 2016. Mutations of *raga gtpase* in *mtorc1* pathway are associated with autosomal dominant cataracts. *PLoS genetics*. 12(6):e1006090.
- Coccia M, Brooks SP, Webb TR, Christodoulou K, Wozniak IO, Murday V, Balicki M, Yee HA, Wangenstein T, Riise R et al. 2009. X-linked cataract and nance-horan syndrome are allelic disorders. *Human molecular genetics*. 18(14):2643-2655.
- Conley YP, Erturk D, Keverline A, Mah TS, Keravala A, Barnes LR, Bruchis A, Hess JF, FitzGerald PG, Weeks DE et al. 2000. A juvenile-onset, progressive cataract locus on chromosome 3q21-q22 is associated with a missense

## Supplementary data

- mutation in the beaded filament structural protein-2. *American journal of human genetics*. 66(4):1426-1431.
- Eiberg H, Mikkelsen AF, Bak M, Tommerup N, Lund AM, Wenzel A, Sabarinathan R, Gorodkin J, Bang-Berthelsen CH, Hansen L. 2019. A splice-site variant in the lncrna gene rp1-140a9.1 cosegregates in the large volkmann cataract family. *Molecular vision*. 25:1-11.
- Evers C, Paramasivam N, Hinderhofer K, Fischer C, Granzow M, Schmidt-Bacher A, Eils R, Steinbeisser H, Schlesner M, Moog U. 2015. Sipa113 identified by linkage analysis and whole-exome sequencing as a novel gene for autosomal recessive congenital cataract. *European journal of human genetics : EJHG*. 23(12):1627-1633.
- Girelli D, Corrocher R, Bisceglia L, Olivieri O, De Franceschi L, Zelante L, Gasparini P. 1995. Molecular basis for the recently described hereditary hyperferritinemia-cataract syndrome: A mutation in the iron-responsive element of ferritin I-subunit gene (the "verona mutation"). *Blood*. 86(11):4050-4053.
- Glaser T, Jepeal L, Edwards JG, Young SR, Favor J, Maas RL. 1994. Pax6 gene dosage effect in a family with congenital cataracts, aniridia, anophthalmia and central nervous system defects. *Nature genetics*. 7(4):463-471.
- Greenlees R, Mihelec M, Yousoof S, Speidel D, Wu SK, Rinkwitz S, Prokudin I, Perveen R, Cheng A, Ma A et al. 2015. Mutations in sipa113 cause eye defects through disruption of cell polarity and cytoskeleton organization. *Human molecular genetics*. 24(20):5789-5804.
- Ha TT, Sadleir LG, Mandelstam SA, Paterson SJ, Scheffer IE, Gecz J, Corbett MA. 2016. A mutation in col4a2 causes autosomal dominant porencephaly with cataracts. *American journal of medical genetics Part A*. 170a(4):1059-1063.
- Hansen L, Comyn S, Mang Y, Lind-Thomsen A, Myhre L, Jean F, Eiberg H, Tommerup N, Rosenberg T, Pilgrim D. 2014. The myosin chaperone unc45b is involved in lens development and autosomal dominant juvenile cataract. *European journal of human genetics : EJHG*. 22(11):1290-1297.
- Heon E, Priston M, Schorderet DF, Billingsley GD, Girard PO, Lubsen N, Munier FL. 1999. The gamma-crystallins and human cataracts: A puzzle made clearer. *American journal of human genetics*. 65(5):1261-1267.

## Supplementary data

- Iliff BW, Riazuddin SA, Gottsch JD. 2012. A single-base substitution in the seed region of mir-184 causes edict syndrome. *Investigative ophthalmology & visual science*. 53(1):348-353.
- Jakobs PM, Hess JF, FitzGerald PG, Kramer P, Weleber RG, Litt M. 2000. Autosomal-dominant congenital cataract associated with a deletion mutation in the human beaded filament protein gene *bfsp2*. *American journal of human genetics*. 66(4):1432-1436.
- Jamieson RV, Farrar N, Stewart K, Perveen R, Mihelec M, Carette M, Grigg JR, McAvoy JW, Lovicu FJ, Tam PP et al. 2007. Characterization of a familial t(16;22) balanced translocation associated with congenital cataract leads to identification of a novel gene, *tmem114*, expressed in the lens and disrupted by the translocation. *Human mutation*. 28(10):968-977.
- Jamieson RV, Perveen R, Kerr B, Carette M, Yardley J, Heon E, Wirth MG, van Heyningen V, Donnai D, Munier F et al. 2002. Domain disruption and mutation of the *bzip* transcription factor, *maf*, associated with cataract, ocular anterior segment dysgenesis and coloboma. *Human molecular genetics*. 11(1):33-42.
- Javadiyan S, Craig JE, Souzeau E, Sharma S, Lower KM, Mackey DA, Staffieri SE, Elder JE, Taranath D, Straga T et al. 2017. High-throughput genetic screening of 51 pediatric cataract genes identifies causative mutations in inherited pediatric cataract in south eastern australia. *G3 (Bethesda, Md)*. 7(10):3257-3268.
- Kannabiran C, Rogan PK, Olmos L, Basti S, Rao GN, Kaiser-Kupfer M, Hejtmancik JF. 1998. Autosomal dominant zonular cataract with sutural opacities is associated with a splice mutation in the *betaa3/a1-crystallin* gene. *Molecular vision*. 4:21.
- Khan AO, Aldahmesh MA, Alkuraya FS. 2015. Phenotypes of recessive pediatric cataract in a cohort of children with identified homozygous gene mutations (an american ophthalmological society thesis). *Transactions of the American Ophthalmological Society*. 113:T7.
- Kloeckener-Gruissem B, Vandekerckhove K, Nürnberg G, Neidhardt J, Zeitz C, Nürnberg P, Schipper I, Berger W. 2008. Mutation of solute carrier *slc16a12* associates with a syndrome combining juvenile cataract with microcornea and renal glucosuria. *American journal of human genetics*. 82(3):772-779.

## Supplementary data

- Knopf EB, Vilches C, Camargo SMR, Errasti-Murugarren E, Staubli A, Mayayo C, Munier FL, Miroshnikova N, Poncet N, Junza A et al. 2019. Dysfunctional lat2 amino acid transporter is associated with cataract in mouse and humans. *Frontiers in physiology*. 10:688.
- Lachke SA, Alkuraya FS, Kneeland SC, Ohn T, Aboukhalil A, Howell GR, Saadi I, Cavallesco R, Yue Y, Tsai AC et al. 2011. Mutations in the rna granule component tdrd7 cause cataract and glaucoma. *Science (New York, NY)*. 331(6024):1571-1576.
- Li D, Wang S, Ye H, Tang Y, Qiu X, Fan Q, Rong X, Liu X, Chen Y, Yang J et al. 2016. Distribution of gene mutations in sporadic congenital cataract in a han chinese population. *Molecular vision*. 22:589-598.
- Li J, Leng Y, Han S, Yan L, Lu C, Luo Y, Zhang X, Cao L. 2018. Clinical and genetic characteristics of chinese patients with familial or sporadic pediatric cataract. *Orphanet journal of rare diseases*. 13(1):94.
- Litt M, Carrero-Valenzuela R, LaMorticella DM, Schultz DW, Mitchell TN, Kramer P, Maumenee IH. 1997. Autosomal dominant cerulean cataract is associated with a chain termination mutation in the human beta-crystallin gene crybb2. *Human molecular genetics*. 6(5):665-668.
- Litt M, Kramer P, LaMorticella DM, Murphey W, Lovrien EW, Weleber RG. 1998. Autosomal dominant congenital cataract associated with a missense mutation in the human alpha crystallin gene cryaa. *Human molecular genetics*. 7(3):471-474.
- Mackay D, Ionides A, Kibar Z, Rouleau G, Berry V, Moore A, Shiels A, Bhattacharya S. 1999. Connexin46 mutations in autosomal dominant congenital cataract. *American journal of human genetics*. 64(5):1357-1364.
- Muller M, Bhattacharya SS, Moore T, Prescott Q, Wedig T, Herrmann H, Magin TM. 2009. Dominant cataract formation in association with a vimentin assembly disrupting mutation. *Human molecular genetics*. 18(6):1052-1057.
- Percin EF, Ploder LA, Jessica JY, Arici K, Horsford DJ, Rutherford A, Bapat B, Cox DW, Duncan AM, Kalnins VI. 2000. Human microphthalmia associated with mutations in the retinal homeobox gene chx10. *Nature genetics*. 25(4):397-401.
- Pras E, Levy-Nissenbaum E Fau - Bakhan T, Bakhan T Fau - Lahat H, Lahat H Fau - Assia E, Assia E Fau - Geffen-Carmi N, Geffen-Carmi N Fau - Frydman M,

## Supplementary data

- Frydman M Fau - Goldman B, Goldman B Fau - Pras E, Pras E. 2002. A missense mutation in the *lim2* gene is associated with autosomal recessive presenile cataract in an inbred iraqi jewish family. (0002-9297 (Print)).
- Ramachandran RD, Perumalsamy V, Hejtmancik JF. 2007. Autosomal recessive juvenile onset cataract associated with mutation in *bfs1*. *Human genetics*. 121(3-4):475-482.
- Reis LM, Tyler RC, Muheisen S, Raggio V, Salviati L, Han DP, Costakos D, Yonath H, Hall S, Power P et al. 2013. Whole exome sequencing in dominant cataract identifies a new causative factor, *cryba2*, and a variety of novel alleles in known genes. *Human genetics*. 132(7):761-770.
- Riazuddin SA, Yasmeen A, Yao W, Sergeev YV, Zhang Q, Zulfiqar F, Riaz A, Riazuddin S, Hejtmancik JF. 2005. Mutations in *betab3-crystallin* associated with autosomal recessive cataract in two pakistani families. *Investigative ophthalmology & visual science*. 46(6):2100-2106.
- Richards S, Aziz N, Bale S, Bick D, Das S, Gastier-Foster J, Grody WW, Hegde M, Lyon E, Spector E. 2015. Standards and guidelines for the interpretation of sequence variants: A joint consensus recommendation of the american college of medical genetics and genomics and the association for molecular pathology. *Genetics in medicine*. 17(5):405-423.
- Semina EV, Brownell I, Mintz-Hittner HA, Murray JC, Jamrich M. 2001. Mutations in the human forkhead transcription factor *foxe3* associated with anterior segment ocular dysgenesis and cataracts. *Human molecular genetics*. 10(3):231-236.
- Semina EV, Ferrell RE, Mintz-Hittner HA, Bitoun P, Alward WL, Reiter RS, Funkhauser C, Daack-Hirsch S, Murray JC. 1998. A novel homeobox gene *pitx3* is mutated in families with autosomal-dominant cataracts and *asmd*. *Nature genetics*. 19(2):167-170.
- Shiels A, Bennett TM, Hejtmancik JF. 2010. *Cat-map*: Putting cataract on the map. *Molecular vision*. 16:2007-2015.
- Shiels A, Bennett TM, Knopf HL, Maraini G, Li A, Jiao X, Hejtmancik JF. 2008. The *epha2* gene is associated with cataracts linked to chromosome 1p. *Molecular vision*. 14:2042-2055.
- Shiels A, Bennett TM, Knopf HL, Yamada K, Yoshiura K, Niikawa N, Shim S, Hanson PI. 2007. *Chmp4b*, a novel gene for autosomal dominant cataracts

## Supplementary data

- linked to chromosome 20q. *American journal of human genetics*. 81(3):596-606.
- Shiels A, Mackay D, Ionides A, Berry V, Moore A, Bhattacharya S. 1998. A missense mutation in the human connexin50 gene (*gja8*) underlies autosomal dominant "zonular pulverulent" cataract, on chromosome 1q. *American journal of human genetics*. 62(3):526-532.
- Stambolian D, Ai Y, Sidjanin D, Nesburn K, Sathe G, Rosenberg M, Bergsma DJ. 1995. Cloning of the galactokinase cDNA and identification of mutations in two families with cataracts. *Nature genetics*. 10(3):307-312.
- Stephan DA, Gillanders E, Vanderveen D, Freas-Lutz D, Wistow G, Baxevanis AD, Robbins CM, VanAuken A, Quesenberry MI, Bailey-Wilson J et al. 1999. Progressive juvenile-onset punctate cataracts caused by mutation of the gammaD-crystallin gene. *Proceedings of the National Academy of Sciences of the United States of America*. 96(3):1008-1012.
- Sun H, Ma Z, Li Y, Liu B, Li Z, Ding X, Gao Y, Ma W, Tang X, Li X et al. 2005. Gamma-s crystallin gene (*crygs*) mutation causes dominant progressive cortical cataract in humans. *Journal of medical genetics*. 42(9):706-710.
- Sun M, Chen C, Hou S, Li X, Wang H, Zhou J, Chen X, Liu P, Kijlstra A, Lin S et al. 2019. A novel mutation of *pank4* causes autosomal dominant congenital posterior cataract. *Human mutation*. 40(4):380-391.
- Taylor RL, Handley MT, Waller S, Campbell C, Urquhart J, Meynert AM, Ellingford JM, Donnelly D, Wilcox G, Lloyd IC et al. 2017. Novel *pex11b* mutations extend the peroxisome biogenesis disorder 14b phenotypic spectrum and underscore congenital cataract as an early feature. *Investigative ophthalmology & visual science*. 58(1):594-603.
- Tzifi F, Pons R, Athanassaki C, Poulou M, Kanavakis E. 2011. Congenital cataracts, facial dysmorphism, and neuropathy syndrome. *Pediatric neurology*. 45(3):206-208.
- Willoughby CE, Shafiq A, Ferrini W, Chan LL, Billingsley G, Priston M, Mok C, Chandna A, Kaye S, Heon E. 2005. *Crybb1* mutation associated with congenital cataract and microcornea. *Molecular vision*. 11:587-593.
- Xia XY, Li N, Cao X, Wu QY, Li TF, Zhang C, Li WW, Cui YX, Li XJ, Xue CY. 2014. A novel *col4a1* gene mutation results in autosomal dominant non-syndromic congenital cataract in a Chinese family. *BMC medical genetics*. 15:97.

## Supplementary data

- Yamakawa N, Oe K, Yukawa N, Murakami K, Nakashima R, Imura Y, Yoshifuji H, Ohmura K, Miura Y, Tomosugi N et al. 2016. A novel phenotype of a hereditary hemochromatosis type 4 with ferroportin-1 mutation, presenting with juvenile cataracts. *Internal medicine (Tokyo, Japan)*. 55(18):2697-2701.
- Yu LC, Twu YC, Chang CY, Lin M. 2001. Molecular basis of the adult i phenotype and the gene responsible for the expression of the human blood group i antigen. *Blood*. 98(13):3840-3845.
- Yuan L, Yi J, Lin Q, Xu H, Deng X, Xiong W, Xiao J, Jiang C, Yuan X, Chen Y et al. 2016. Identification of a prx variant in a chinese family with congenital cataract by exome sequencing. *QJM : monthly journal of the Association of Physicians*. 109(11):731-735.
- Zhao L, Chen XJ, Zhu J, Xi YB, Yang X, Hu LD, Ouyang H, Patel SH, Jin X, Lin D et al. 2015. Lanosterol reverses protein aggregation in cataracts. *Nature*. 523(7562):607-611.
- Zuker M. 2003. Mfold web server for nucleic acid folding and hybridization prediction. *Nucleic acids research*. 31(13):3406-3415.
